# Supplementary material
Source: publisher figshare collection journal article supplement (https://diabetesjournals.figshare.com/articles/dataset/_/19610097)
Supplement: Supplementary file 1 [file 1]

## **SUPPLEMENTARY DATA**

### **Hepatic GSK3 $\beta$ -dependent CRY1 Degradation Contributes to Diabetic Hyperglycemia**

Ye Young Kim, Hagoon Jang, Gung Lee, Yong Geun Jeon, Jee Hyung Sohn, Ji Seul Han, Won Taek Lee, Jeu Park, Jin Young Huh, Hahn Nahmgoong, Sang Mun Han, Jeesoo Kim, Minwoo Pak, Sun Kim, Jong-Seo Kim, and Jae Bum Kim

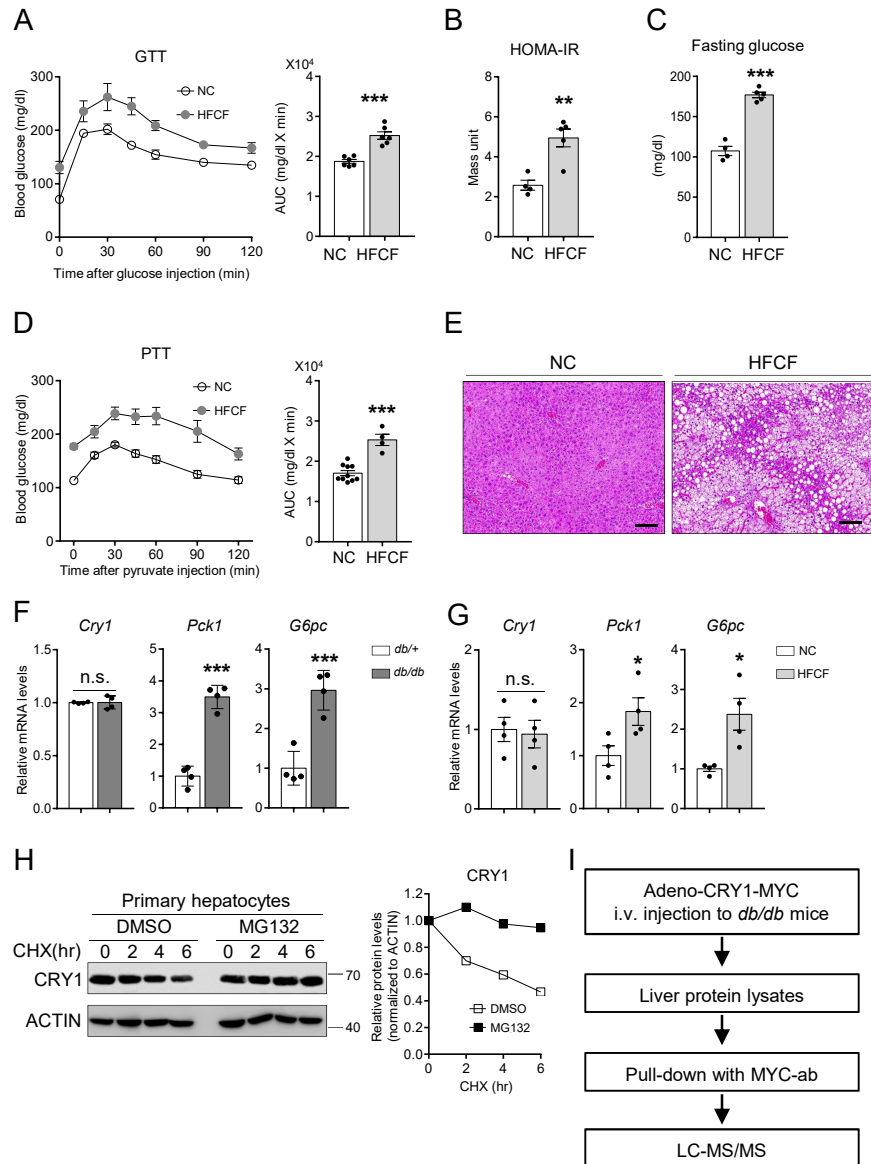

**Supplementary Figure 1. The phenotype of NC-fed and HFCF-fed mice and strategy of CRY1 binding proteins in the liver.** A: Intraperitoneal GTT and AUC analysis of NC- or HFCF-fed WT mice. \*\*\* $P < 0.001$  vs. NC-fed WT mice by Student's  $t$ -test. B and C: Measurement of HOMA-IR (B) and fasting blood glucose levels (C) of NC- or HFCF-fed WT mice. \*\* $P < 0.01$ , \*\*\* $P < 0.001$  vs. NC-fed WT mice by Student's  $t$ -test. D: Intraperitoneal PTT and AUC analysis of NC- or HFCF-fed WT mice. \*\*\* $P < 0.001$  vs. NC-fed WT mice by Student's  $t$ -test. E: Representative images of hematoxylin and eosin-stained sections of livers of NC- or HFCF-fed WT mice. F and G: qRT-PCR analyses of *Cry1* and gluconeogenic gene (*Pck1* and *G6pc*) expression in liver lysates from *db/+* and *db/db* mice (F) and NC- and HFCF-fed mice (G). \* $P < 0.05$ , \*\*\* $P < 0.001$  vs. each control group by Student's  $t$ -test. H: CRY1 protein stability in primary hepatocytes treated with CHX (30 μmol/L) for the indicated periods with or without MG132 (20 μmol/L) treatment. I: Experimental strategy of the LC-MS/MS analysis to identify CRY1 binding proteins in the liver. Mean and SEM of the band intensities were calculated from independent experiments using Image J. Data are mean ± SEM. n.s., not significant; CHX, cycloheximide.

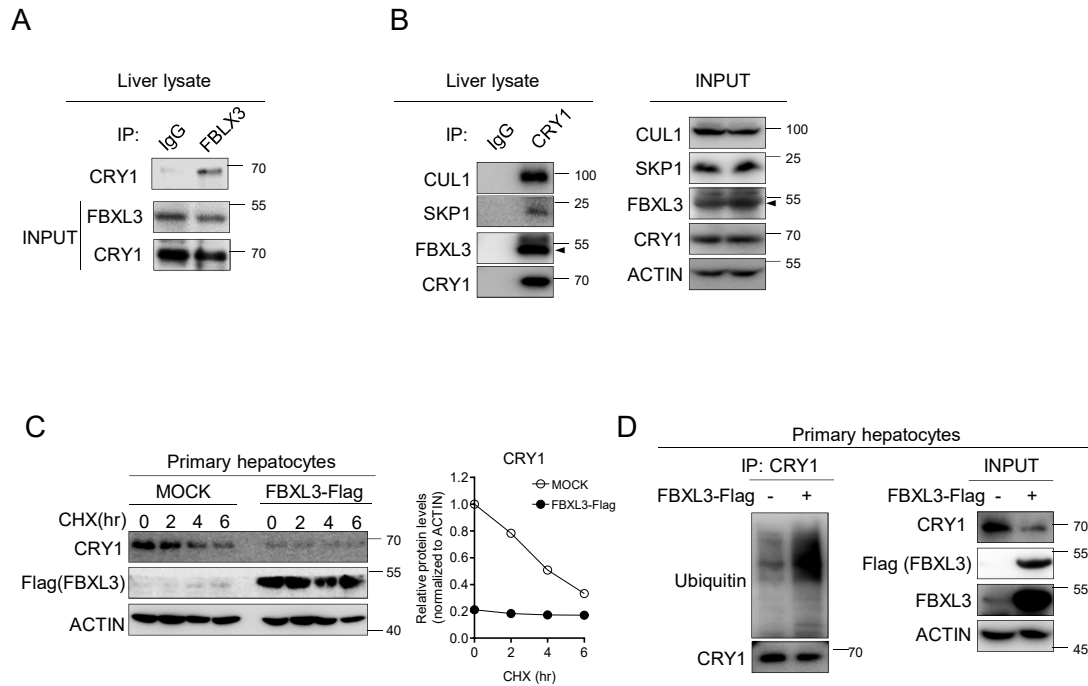

**Supplementary Figure 2. FBXL3 regulates CRY1 protein stability in hepatocytes.** A: Endogenous coimmunoprecipitation using FBXL3 antibody with liver lysates. B: Endogenous coimmunoprecipitation using CRY1 antibody with liver lysates. C: CRY1 protein stability. Primary hepatocytes were transfected with MOCK or FBXL3 expression vectors and were harvested at the indicated time points after CHX (30  $\mu\text{mol/L}$ ) treatment. D: Cell-based ubiquitination assay in primary hepatocytes. Cells were transfected with MOCK or FBXL3 expression vectors without MG132 treatment. Mean and SD of the band intensities were calculated from independent experiments using Image J. Data are mean  $\pm$  SD.

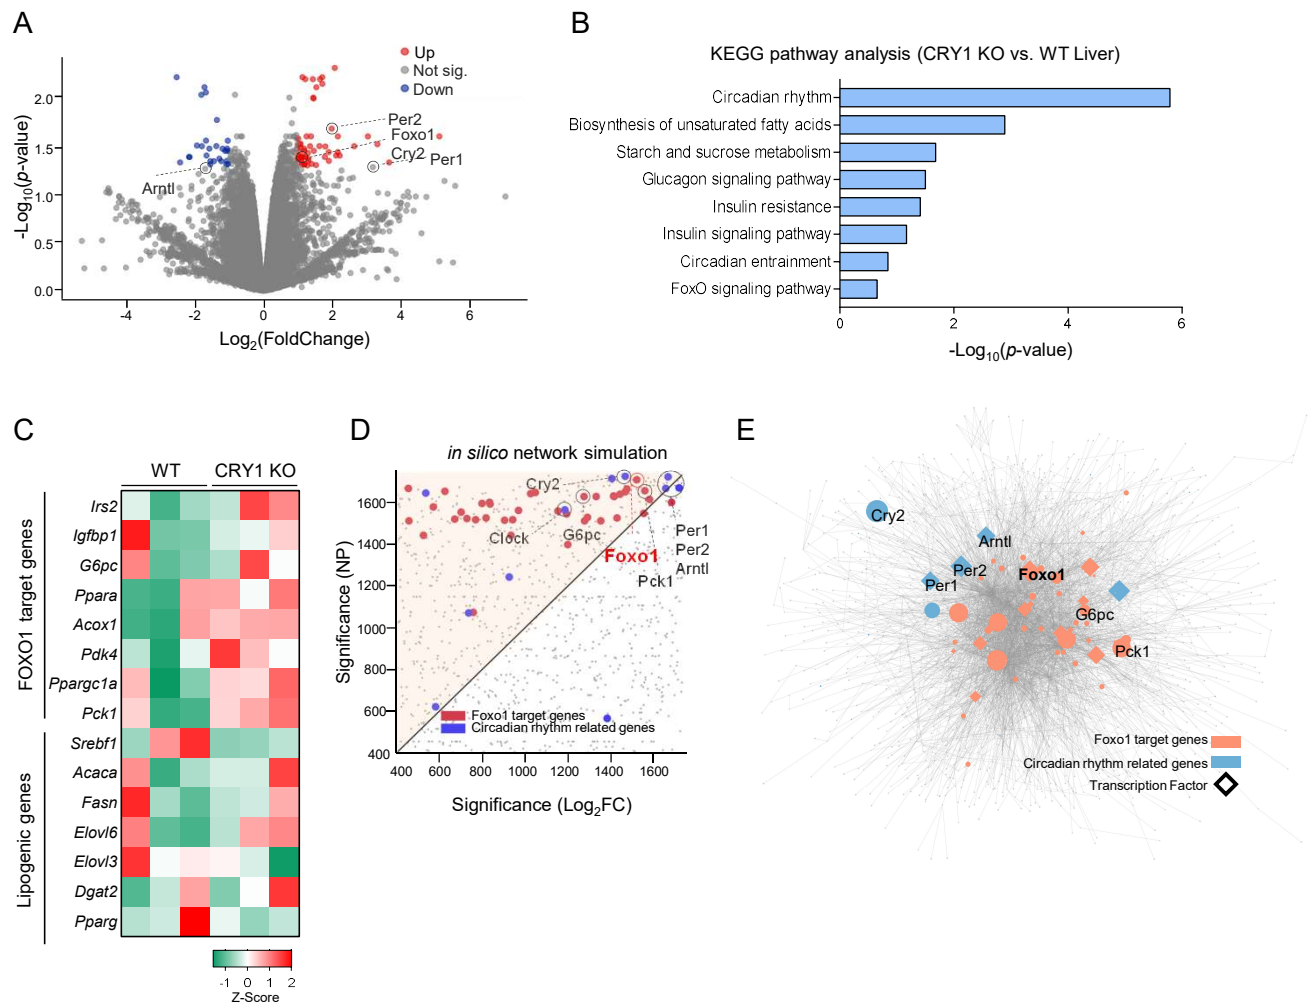

**Supplementary Figure 3. FOXO1 target genes are highly expressed in liver of CRY1 KO mice.** A: Volcano plot of differentially expressed genes (DEG) identified with  $0.05 > \text{adjusted } p\text{-value}$  threshold. Red dots represent upregulated genes and blue dots represent downregulated genes of the plot. B: KEGG pathway enrichment of upregulated genes in liver from CRY1 KO. C: Heatmap showing the expression levels of FOXO1 target genes and lipogenic genes in liver from CRY1 KO and WT mice. D: Scatter plot representing gene significance of network propagation (NP) scores and fold change (FC). Red dots represent genes that are FOXO1 target genes and blue dots represent circadian rhythm-related genes. E: The whole transcription-factor target gene (TFTG) network containing genes in the FOXO1 target genes and circadian rhythm-related genes, respectively. Node size corresponds to NP score. The higher the NP score, the bigger the node size.

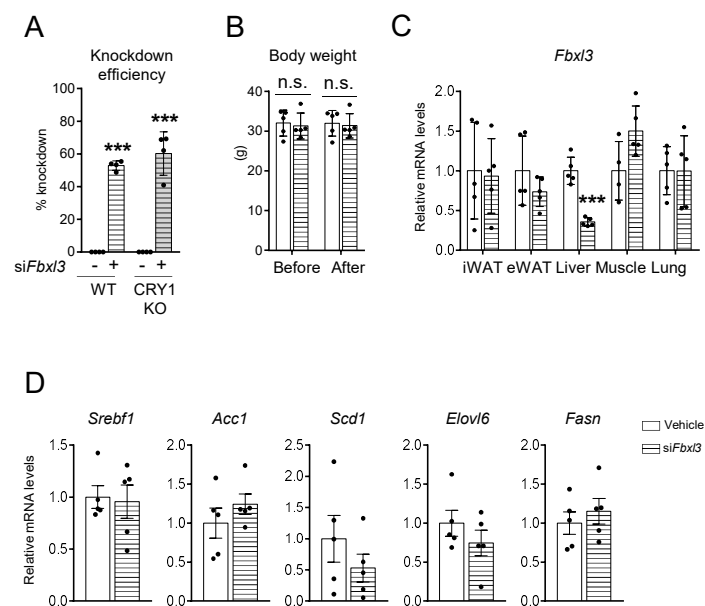

**Supplementary Figure 4. FBXL3-CRY1 axis regulates hepatic glucose production.** A: Knockdown efficiency of *Fbxl3* gene expression in primary hepatocytes from WT and CRY1 KO. \*\*\* $P < 0.001$  vs. WT, siNC group by two-way ANOVA followed by Sidak's post-hoc test. B: Body weights of vehicle-treated and siFbxl3-treated mice before and after treatment. C: qRT-PCR analysis of *Fbxl3* in inguinal white adipose tissue (iWAT), epididymal white adipose tissue (eWAT), liver, skeletal muscle, and lung of vehicle-treated and siFbxl3-treated mice. D: qRT-PCR analysis of lipogenic gene expression in liver of vehicle-treated and siFbxl3-treated mice.

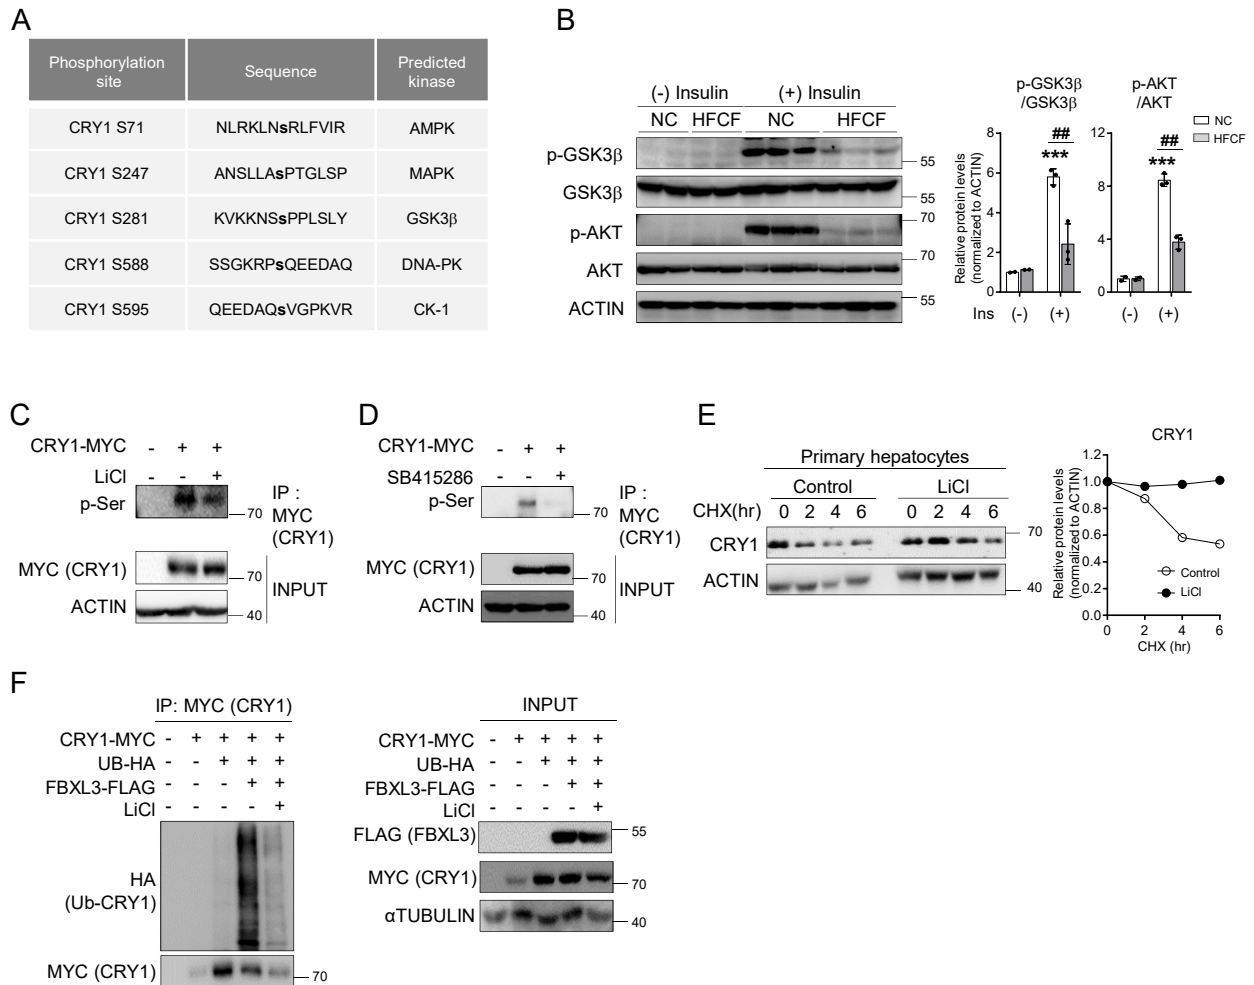

**Supplementary Figure 5. GSK3 $\beta$  is involved in CRY1 phosphorylation and FBXL3-dependent degradation.** A: Scansite 4.0 and phosphoSitePlus predictions of mouse CRY1 phosphorylation sites [37, 38]. B: Western blot analysis of insulin signaling cascade in liver lysates from NC- or HFCF-fed mice. \*\*\* $P$  < 0.001 vs. vehicle-treated NC-fed WT mice; ## $P$  < 0.01 vs. vehicle-treated HFCF-fed WT mice by two-way ANOVA followed by Sidak's post-hoc test. C and D: Immunoprecipitation-western blot analysis of the level of CRY1 protein phosphorylation in HEK293T cells treated without or with GSK3 $\beta$  inhibitor LiCl (20 mmol/L) (C) or SB415286 (20  $\mu$ mol/L) (D) for 2 h. E: CRY1 protein stability in primary hepatocytes treated with CHX (30  $\mu$ mol/L) for the indicated periods with or without GSK3 $\beta$  inhibitor LiCl (20 mmol/L). F: Cell-based ubiquitination assay. COS1 cells were cotransfected without or with plasmids encoding CRY1-MYC, ubiquitin-HA, and FBXL3-Flag. Cells were incubated without or with LiCl (20 mmol/L) prior to MG132 (20  $\mu$ mol/L) treatment for 6 h. Mean and SD of the band intensities were calculated from independent experiments using Image J. Data are mean  $\pm$  SD. UB, ubiquitin; CHX, cycloheximide; IP, immunoprecipitation.

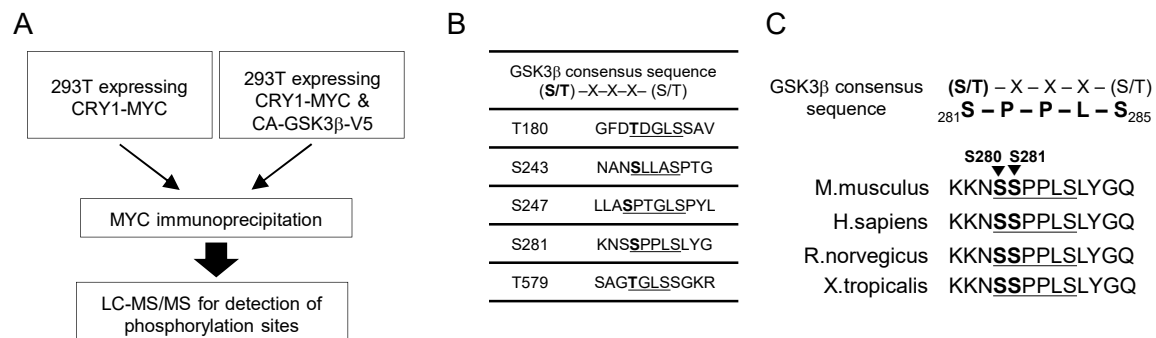

**Supplementary Figure 6. MS-based and *in silico* analyses of potential phosphorylation residue(s) in the CRY1 protein by GSK3β.** A: Scheme of MS analysis to identify CRY1 phosphorylation sites using liver lysates of *db/db* mice. B: Identification of GSK3β phosphorylation sites in CRY1 (data from GPS 5.0 software (<http://gps.biocuckoo.cn>) [37]). C: Alignment of CRY1 amino acid sequences from several species with potential CRY1 phosphorylation sites.

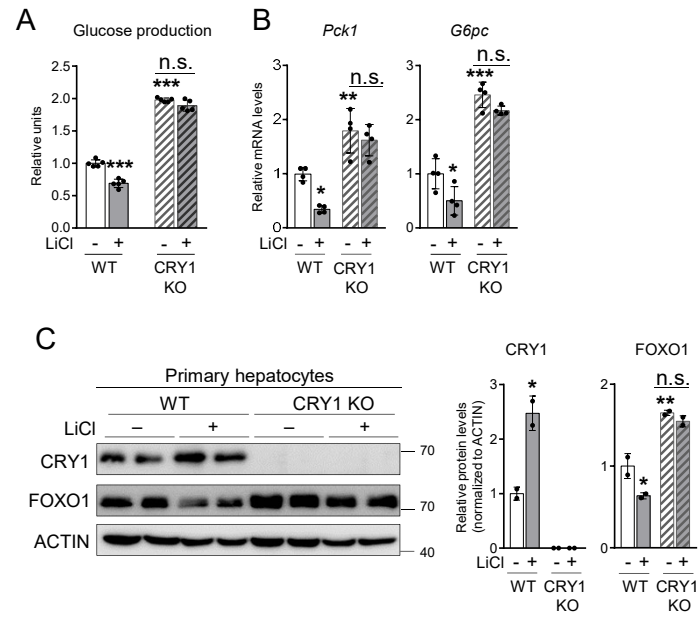

**Supplementary Figure 7. Inhibition of GSK3 $\beta$  downregulates CRY1-mediated gluconeogenesis in hepatocytes.**

A–C: Primary hepatocytes isolated from WT and CRY1 KO mice were incubated without or with LiCl (20 mmol/L) for 8 h. Glucose production assay (A), qRT-PCR analysis of gluconeogenic gene expression (B), and western blot analysis of CRY1 and FOXO1 protein (C) are shown. \* $P < 0.05$ , \*\* $P < 0.01$ , \*\*\* $P < 0.001$  vs. WT, PBS group by two-way ANOVA followed by Sidak's post-hoc test. Mean and SD of the band intensities were calculated from independent experiments using Image J. Data are mean  $\pm$  SD.



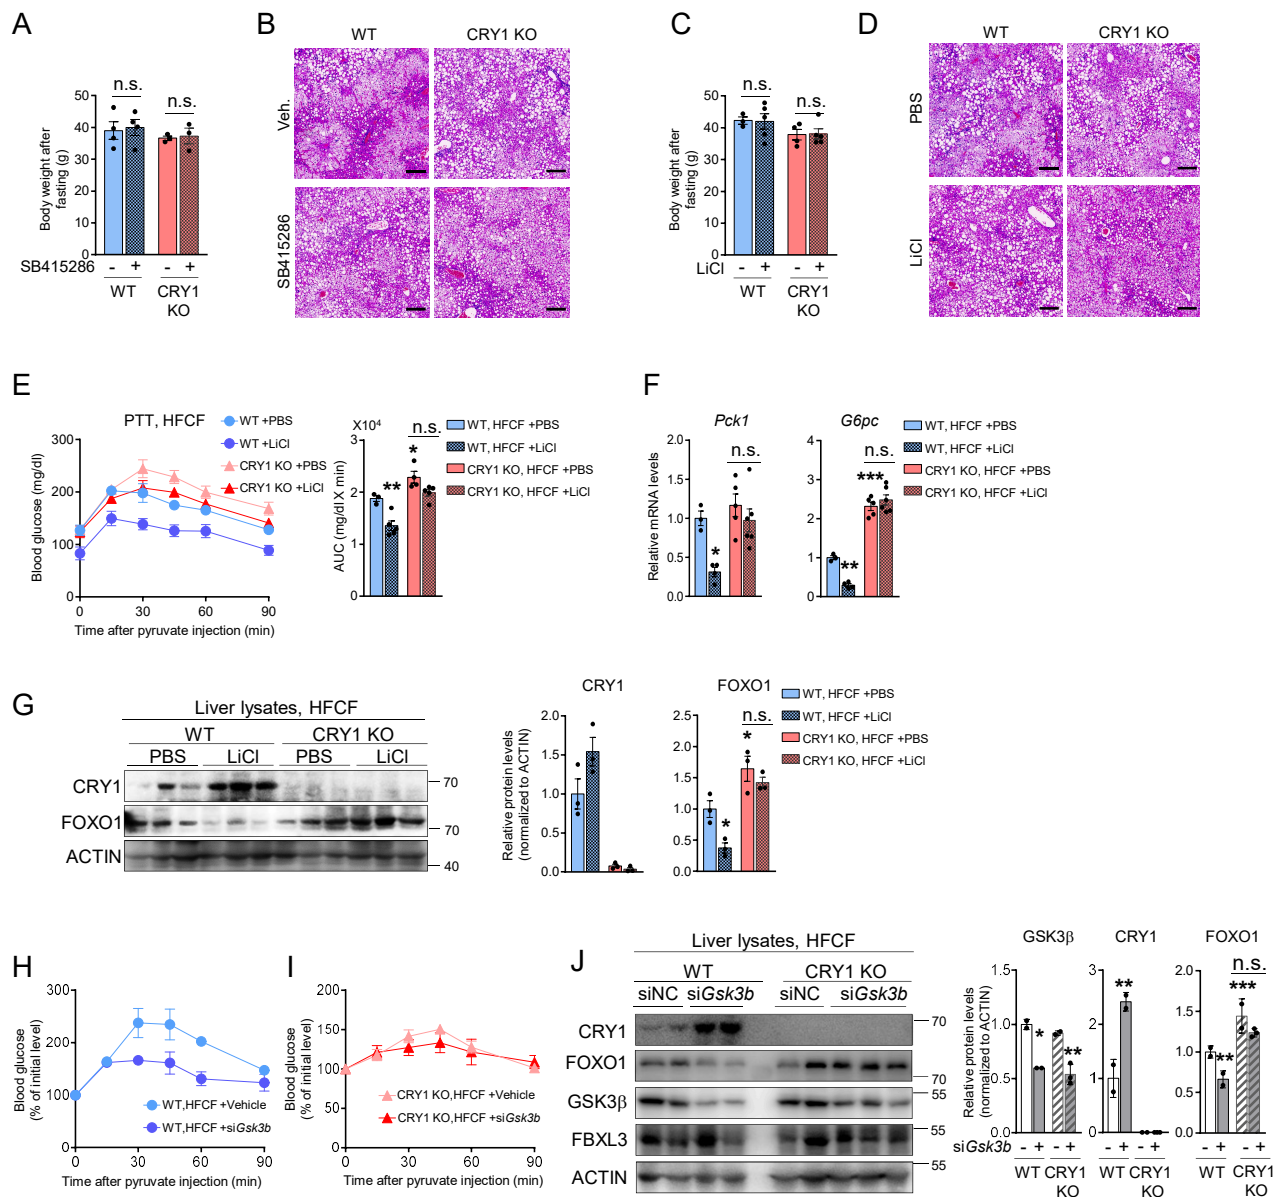

**Supplementary Figure 8. GSK3 $\beta$  suppression restores CRY1 protein and alleviates HGP.** A–B: SB415286 (5 mg/kg) was intraperitoneally injected into HFCF-fed WT or CRY1 KO mice. Body weights (A), representative images of hematoxylin and eosin-stained liver sections (B) of vehicle or SB415286-treated mice. C–G: LiCl (3 mM/kg) was intraperitoneally injected into HFCF-fed WT or CRY1 KO mice. Body weights (C), representative images of hematoxylin and eosin-stained liver sections (D), Intraperitoneal PTT and AUC analysis (E) of vehicle or LiCl-treated mice. qRT-PCR analysis of gluconeogenic gene expression (F) and western blot analysis (G) in the livers of vehicle or LiCl-treated mice. \* $P < 0.05$ , \* $P < 0.01$ , \*\*\* $P < 0.001$  vs. vehicle-treated HFCF-fed WT mice by two-way ANOVA followed by Sidak's post-hoc test. H–J: siGsk3b was intravenously injected into HFCF-fed WT or CRY1 KO mice. Intraperitoneal PTT analysis of HFCF-fed WT mice (H), Intraperitoneal PTT analysis of HFCF-fed CRY1 KO mice (I). Western blot analysis of livers of HFCF-fed WT and KO mice (J). Mean and SEM of the band intensities were calculated from independent experiments using Image J. Data are mean  $\pm$  SEM. n.s., not significant.

**Supplementary Table 1. List of the putative binding proteins of CRY1.**

| Proteins | Full names                                                      |
|----------|-----------------------------------------------------------------|
| PER1     | Period circadian clock 1                                        |
| FBXL3    | F-box and leucine-rich repeat protein 3                         |
| SKP1     | S-phase kinase-associated protein 1                             |
| DTX3L    | Deltex 3-like, E3 ubiquitin ligase                              |
| TLK2     | Serine/threonine-protein kinase tousled-like 2                  |
| FASN     | Fatty acid synthase                                             |
| Timm9    | Translocase of inner mitochondrial membrane 9                   |
| PYC      | Pyruvate carboxylase, mitochondrial                             |
| RL40     | Ubiquitin-60S ribosomal protein L40                             |
| THIKB    | 3-ketoacyl-CoA thiolase B, peroxisomal                          |
| APOE     | Apolipoprotein E                                                |
| ECHM     | Enoyl-CoA hydratase, mitochondrial                              |
| AATM     | Aspartate aminotransferase, mitochondrial                       |
| GPX1     | Glutathione peroxidase 1                                        |
| PLIN4    | Perilipin-4                                                     |
| ACADV    | Very long-chain specific acyl-CoA dehydrogenase, mitochondrial  |
| CX6B1    | Cytochrome c oxidase subunit 6B1                                |
| THIM     | 3-ketoacyl-CoA thiolase, mitochondrial                          |
| AL1L1    | Cytosolic 10-formyltetrahydrofolate dehydrogenase               |
| ODPB     | Pyruvate dehydrogenase E1 component subunit beta, mitochondrial |
| APOA1    | Apolipoprotein A-I                                              |
| NDUA7    | NADH dehydrogenase [ubiquinone] 1 alpha subcomplex subunit 7    |
| ACLY     | ATP-citrate synthase                                            |

**Supplementary Table 2. Primers used for qRT-PCR**

| Gene        | Forward               | Reverse              |
|-------------|-----------------------|----------------------|
| Mouse Cry1  | GTGGATCAGCTGGGAAGAAG  | CACAGGGCAGTAGCAGTGAA |
| Mouse Fbxl3 | CAGGACTCTGCTGAGGAAGG  | CAGCTGATTCTTTGCTGCTG |
| Mouse Pck1  | ATCTTTGGTGGCCGTAGACCT | CCGAAGTTGTAGCCGAAGAA |
| Mouse G6pc  | AGGAAGGATGGAGGAAGGAA  | TGGAACCAGATGGGAAAGAG |
| Mouse Dtx3l | GAATGCAGCCTTACCTGCTC  | TGGCTTTGCTGATACACGAG |
| Mouse Tbp   | GGGAGAATCATGGACCAGAA  | CCGTAAGGCATCATTGGACT |

**Supplementary Table 3. NP score of candidate genes in liver of CRY1 KO mice compared to WT**

| Proteins | NP_score | Log2FC  | NP_score_rank | Log2FC_rank | NP_rank_ratio |
|----------|----------|---------|---------------|-------------|---------------|
| Cyp3a11  | 0.2188   | 1.6401  | 1             | 97          | 0.0578        |
| Bik      | 0.2147   | 0.4220  | 2             | 619         | 0.1157        |
| Cpt1a    | 0.2142   | 0.7082  | 3             | 349         | 0.1735        |
| Nfe2l2   | 0.2114   | 0.6373  | 4             | 390         | 0.2313        |
| Bhlhe40  | 0.2103   | 1.8925  | 5             | 74          | 0.2892        |
| Cry2     | 0.2056   | 0.8738  | 6             | 264         | 0.3470        |
| Per2     | 0.2055   | 1.9774  | 7             | 65          | 0.4049        |
| Pklr     | 0.2054   | 0.7348  | 8             | 328         | 0.4627        |
| Dbp      | 0.2050   | 2.2127  | 9             | 53          | 0.5205        |
| Skil     | 0.2037   | -0.7206 | 10            | 335         | 0.5784        |
| Txnip    | 0.2037   | 2.1550  | 11            | 57          | 0.6362        |
| Scd1     | 0.2015   | 1.2493  | 12            | 157         | 0.6940        |
| Elovl5   | 0.2015   | 0.9301  | 13            | 240         | 0.7519        |
| Zbtb16   | 0.2009   | 3.3035  | 14            | 13          | 0.8097        |
| Gys2     | 0.2009   | 0.8967  | 15            | 257         | 0.8676        |
| Hnf4a    | 0.2007   | 0.7358  | 16            | 326         | 0.9254        |
| Tfb2m    | 0.2006   | 0.4572  | 17            | 563         | 0.9832        |
| Il6ra    | 0.2005   | 2.1051  | 18            | 60          | 1.0411        |
| Pex11a   | 0.2004   | 0.7733  | 19            | 307         | 1.0989        |
| Lgals4   | 0.2004   | 1.4320  | 19            | 131         | 1.0989        |
| Tert     | 0.2004   | -0.9635 | 21            | 232         | 1.2146        |
| Foxo1    | 0.2002   | 1.0077  | 22            | 212         | 1.2724        |
| Itga7    | 0.2002   | -0.7295 | 23            | 332         | 1.3302        |
| Snip3    | 0.2002   | 0.7803  | 24            | 302         | 1.3881        |
| Wee1     | 0.2001   | 3.0286  | 25            | 21          | 1.4459        |
| Krt18    | 0.2001   | -0.7112 | 25            | 346         | 1.4459        |
| Mmp15    | 0.2001   | 0.5431  | 27            | 464         | 1.5616        |
| GlrX     | 0.2000   | -0.9197 | 28            | 247         | 1.6194        |
| Rorc     | 0.2000   | 1.4534  | 29            | 128         | 1.6773        |
| HinfP    | 0.2000   | 1.1789  | 30            | 167         | 1.7351        |
| Slc20a1  | 0.2000   | 1.3023  | 31            | 147         | 1.7929        |
| Zbtb20   | 0.2000   | 1.0042  | 32            | 214         | 1.8508        |
| Tgm1     | 0.2000   | -1.5686 | 33            | 111         | 1.9086        |
| Pdk1     | 0.2000   | 1.0045  | 34            | 213         | 1.9665        |
| St3gal5  | 0.2000   | 1.8960  | 35            | 72          | 2.0243        |
| Nfyb     | 0.2000   | -0.7379 | 36            | 325         | 2.0821        |
| Rgs16    | 0.2000   | 5.1011  | 37            | 3           | 2.1400        |
| Sh3bp2   | 0.2000   | -0.5651 | 38            | 451         | 2.1978        |
| Stard5   | 0.2000   | 0.5030  | 39            | 512         | 2.2556        |
| Herpud1  | 0.2000   | 1.7795  | 39            | 84          | 2.2556        |
| Klf10    | 0.2000   | 2.6314  | 41            | 33          | 2.3713        |
| Nr1i3    | 0.2000   | 1.3975  | 41            | 134         | 2.3713        |
| Klf13    | 0.2000   | 1.2988  | 41            | 149         | 2.3713        |
| Hlf      | 0.2000   | 1.1858  | 41            | 166         | 2.3713        |
| Tef      | 0.2000   | 1.5343  | 41            | 115         | 2.3713        |
| Nr1d2    | 0.2000   | 0.8665  | 41            | 268         | 2.3713        |
| Atf4     | 0.2000   | -0.5334 | 41            | 479         | 2.3713        |
| Sall1    | 0.2000   | 0.9648  | 41            | 230         | 2.3713        |
| Trim24   | 0.2000   | 0.7176  | 41            | 337         | 2.3713        |
| Il2ra    | 0.1698   | -0.3575 | 50            | 704         | 2.8918        |
| Gja1     | 0.1616   | 0.6764  | 51            | 363         | 2.9497        |
| Sox9     | 0.1605   | 0.8760  | 52            | 263         | 3.0075        |
| Ccl5     | 0.1604   | -0.5540 | 53            | 459         | 3.0654        |
| Stat1    | 0.1600   | -0.5304 | 54            | 482         | 3.1232        |
| Abcb1a   | 0.1600   | 0.3311  | 55            | 755         | 3.1810        |
| Kif26b   | 0.1600   | 0.2025  | 56            | 1033        | 3.2389        |
| Cdkn1a   | 0.1196   | 0.1022  | 57            | 1373        | 3.2967        |
| Ddit4    | 0.0806   | 1.0766  | 58            | 191         | 3.3545        |
| Ctnnb1   | 0.0697   | 0.0322  | 59            | 1627        | 3.4124        |
| Per1     | 0.0597   | 3.1719  | 60            | 15          | 3.4702        |

**Supplementary Table 4. MS/MS data of the putative binding proteins of CRY1, related to Fig. 1C.**
